1 ***oca2* targeting using CRISPR/Cas9 in the Malawi cichlid *Astatotilapia calliptera***

2

3 Bethan Clark<sup>\*1</sup>, Joel Elkin<sup>\*1</sup>, Aleksandra Marconi<sup>1</sup>, George F. Turner<sup>2</sup>, Alan M. Smith<sup>3</sup>, Domino  
4 Joyce<sup>3</sup>, Eric A. Miska<sup>4,5,6</sup>, Scott A. Juntti<sup>7</sup>, M. Emília Santos<sup>1,8</sup>

5

6 <sup>1</sup>Department of Zoology, University of Cambridge, United Kingdom

7 <sup>2</sup>School of Natural Sciences, Bangor University, Gwynedd LL57 2TH, United Kingdom

8 <sup>3</sup>Department of Biological & Marine Sciences, University of Hull, United Kingdom

9 <sup>4</sup>Department of Genetics, University of Cambridge, United Kingdom

10 <sup>5</sup>Gurdon Institute, University of Cambridge, CB2 1QN, United Kingdom

11 <sup>6</sup>Wellcome Sanger Institute, Wellcome Trust Genome Campus, Cambridge, United Kingdom

12 <sup>7</sup>University of Maryland, United States of America

13

14 <sup>\*</sup>These two authors contributed equally to this work

15 <sup>8</sup>Author for correspondence: [es754@cam.ac.uk](mailto:es754@cam.ac.uk)

16

17

18 **Abstract**

19

20 Identifying genetic loci underlying trait variation provides insights into the mechanisms of  
21 diversification, but demonstrating causality and characterising the role of genetic loci requires  
22 testing candidate gene function, often in non-model species. Here we establish CRISPR/Cas9  
23 editing in *Astatotilapia calliptera*, a generalist cichlid of the remarkably diverse Lake Malawi  
24 radiation. By targeting the gene *oca2* required for melanin synthesis in other vertebrate  
25 species, we show efficient editing and germline transmission. Gene edits include indels in the  
26 coding region, likely a result of non-homologous end joining, and a large deletion in the 3' UTR  
27 due to homology-directed repair. We find that *oca2* knock-out *A. calliptera* lack melanin, which  
28 may be useful for developmental imaging in embryos and studying colour pattern formation in  
29 adults. As *A. calliptera* resembles the presumed generalist ancestor of the Lake Malawi  
30 cichlids radiation, establishing genome editing in this species will facilitate investigating  
31 speciation, adaptation and trait diversification in this textbook radiation.

## 32 Introduction

33

34 Identifying the genetic and developmental mechanisms underlying novel and variable  
35 morphologies is key to understanding how diversity arises in nature. Instances of adaptive  
36 radiation, that is, the rapid formation of an abundance of diverse species from a common  
37 ancestor, are perfect systems to delve into the basis of diversification and adaptation to distinct  
38 ecological niches (Schluter, 2000). Cichlid fishes are a textbook example for such adaptive  
39 radiations. They are one of the most species-rich vertebrate families comprising over 2200  
40 species which exhibit extraordinary morphological, physiological and behavioural variation  
41 (Kocher, 2004; Salzburger, 2018; Santos and Salzburger, 2012). The majority of species  
42 (~2000) are found in the East African lakes, Tanganyika, Victoria and Malawi. Lake Malawi  
43 alone has over 800 species that emerged in the last 800 000 years (Malinsky et al., 2018;  
44 Salzburger, 2018). They show extensive morphological variation in body shape, craniofacial  
45 skeleton, jaw apparatus, lateral line system, brain, vision and pigmentation phenotypes among  
46 other traits (Carleton et al., 2016; Edgley and Genner, 2019; Kratochwil et al., 2018; Powder  
47 and Albertson, 2016; Roberts et al., 2017; Ronco et al., 2021; Santos et al., 2014; Sylvester  
48 et al., 2010). Despite their morphological diversity, the average sequence divergence between  
49 Malawi cichlid species pairs is only 0.1-0.25%, thus within this lake the evolution of divergent  
50 phenotypes seems to occur through comparatively minor genetic changes (Malinsky et al.,  
51 2018; Svardal et al., 2020). Their genetic similarity enables interspecific hybridisation, which  
52 can be used for quantitative trait loci (QTL) analysis to uncover genes underlying variation in  
53 species specific traits. This is bolstered by their amenability to the lab and the wealth of  
54 genomic resources that have been made available in recent years, including many  
55 representative reference genomes (Brawand et al., 2014). While the aforementioned tools  
56 facilitate the discovery of loci associated with trait diversification, proof of causality can only  
57 be achieved by testing candidate gene function through genome editing.

58

59 Here, we report the application of CRISPR/Cas9 to generate coding and non-coding sequence  
60 mutants in the cichlid *Astatotilapia calliptera*, a maternal mouthbrooder cichlid fish that is part  
61 of the Malawi haplochromine radiation. *A. calliptera* occupies a rich diversity of habitats,  
62 including Lake Malawi, as well as peripheral rivers and lakes (Parsons et al., 2017).  
63 Phylogenetic analysis shows that all Malawi cichlid species can be grouped into seven eco-  
64 morphological groups, resulting from three separate cichlid radiations that stemmed from a  
65 generalist *Astatotilapia*-type ancestral lineage (Malinsky et al., 2018). As such, *A. calliptera* is  
66 a useful model in which to develop functional tools to explore Malawi cichlid speciation and  
67 adaptation. We specifically focused on one *A. calliptera* population from a small crater lake  
68 situated north of Lake Malawi (Figure 1A) referred to in the literature as Lake Masoko (variant

69 spelling Massoko, as used by the German colonial administration) and known locally as Lake  
70 Kisiba (Turner et al., 2019). *A. calliptera* from Lake Masoko/Kisiba is at an early stage of  
71 adaptive divergence where two diverging ecomorphs differ in body shape, diet, trophic  
72 morphology and body colouration (Figure 1B and 1C) making it also an ideal system to study  
73 the early stages of speciation. Importantly, *A. calliptera* has a high-quality reference genome  
74 and is amenable to the lab environment. They have a 8-12 month generation time, breeding  
75 readily in a non-seasonal fashion allowing for year-round egg collection for gene editing and  
76 embryonic developmental studies.

77

78

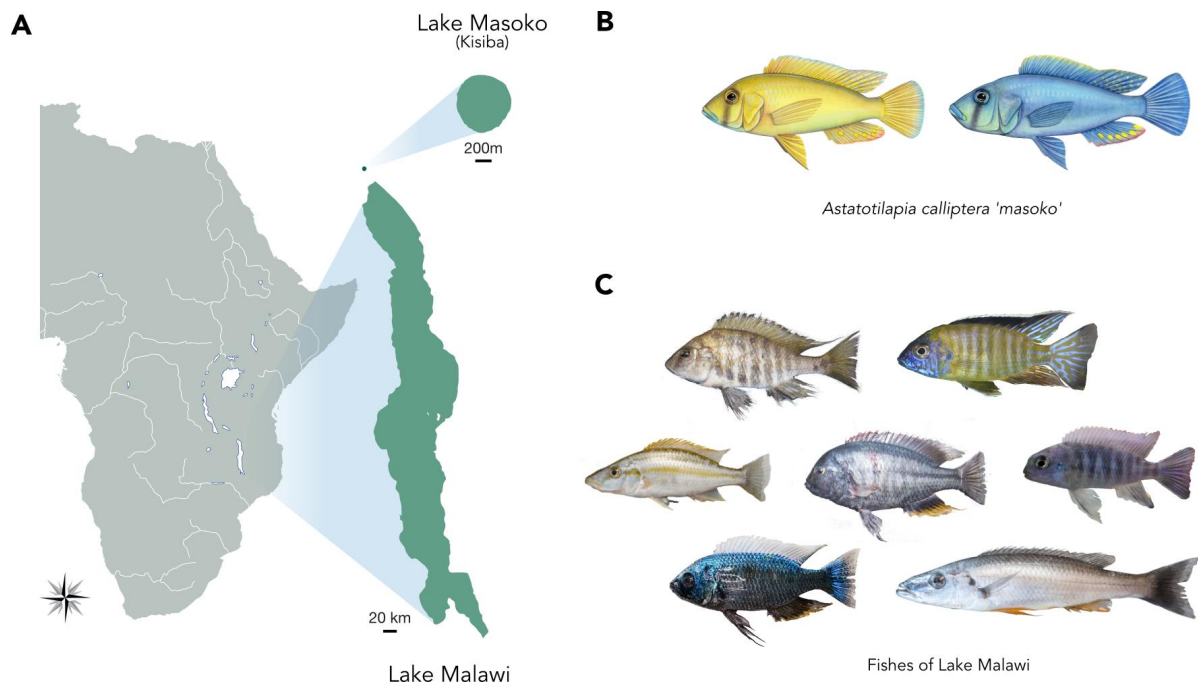

79

80

81 **Figure 1:** *Astatotilapia calliptera* and Malawi cichlids. **A)** Geographical location of Lake Malawi  
82 and Lake Masoko/Kisiba. Map diagram courtesy of Gregoire Vernaz. **B)** The two *A. calliptera*  
83 eco-morphs from Lake Masoko/Kisiba. Drawings by Julie Johnson. **C)** A snapshot of the  
84 diversity of forms present in Lake Malawi. Photographs courtesy of Hannes Svoldal.

85

86

87 We chose to generate mutants for the *Oculocutaneous albinism type II* gene (*oca2*). *Oca2* is  
88 a relatively well-characterised gene and has a readily visible phenotype where black pigment  
89 production - melanin - is impaired (Beirl et al., 2014; Klaassen et al., 2018). It encodes a  
90 melanosomal transmembrane protein associated with the intracellular trafficking of tyrosinase,  
91 a rate-limiting enzyme in the melanin biosynthesis pathway. *Oca2* has been associated with  
92 the evolution of amelanism and albinism in natural populations in multiple vertebrate species,

93 such as humans, snakes, cavefish and cichlids (Edwards et al., 2010; Kratochwil et al., 2019;  
94 O’Gorman et al., 2021; Protas et al., 2006; Saenko et al., 2015).

95

96 In ray-finned fishes, pigmentation patterns are generated by the different number,  
97 combinations and arrangement of pigment cells: such as black melanophores, yellow to red  
98 xanthophores and reflecting silvery iridophores (Parichy, 2021). All pigment cell classes share  
99 an embryonic origin, deriving from the neural crest cell population during early development.  
100 Pigmentation patterning has been extensively studied in zebrafish, where the adult pigment  
101 pattern emerges through the migration and interaction between pigment cells, as well as  
102 interactions between the cells and the tissue environment (Kelsh and Barsh, 2011; Parichy  
103 and Spiewak, 2015; Singh and Nüsslein-Volhard, 2015). *Oca2* knockout in zebrafish is known  
104 to impair melanin production, melanophore differentiation and survival, as well as increasing  
105 the abundance of iridophores without affecting adult patterning (Beirl et al., 2014). Importantly,  
106 *oca2* mutants are viable, making *oca2* single guide RNA (sgRNA) micro-injections an ideal  
107 tool to assess rates of mutagenesis and germline transmission, and to establish CRISPR/Cas9  
108 protocols in *A. calliptera*.

109

110 CRISPR/Cas9 editing tools have revolutionised gene function analysis in a multitude of non-  
111 model species. This is due to the simplicity of the system which requires only Watson-Crick  
112 base pairing between a sgRNA and its target sequence. The Cas9 protein will form a complex  
113 with the sgRNA, which will recognise and bind to its target sequence. The Cas9 protein will  
114 then induce a double-stranded DNA break. When double-stranded breaks are formed, the  
115 intrinsic cellular repair machinery will put the two back together either using non-homologous  
116 end joining (NHEJ) or homology-directed repair (HDR). NHEJ is an imprecise mechanism  
117 that generates small insertions or deletions that result in a frameshift. This method has been  
118 widely used to induce frameshift mutations in coding protein sequences leading to loss of  
119 function alleles in many model systems including other cichlids (Fang et al., 2018; Höch et al.,  
120 2021; Kratochwil et al., 2018; Li et al., 2021, 2014; Livraghi et al., 2021; Rasys et al., 2019;  
121 Wang et al., 2021). HDR on the other hand utilises a DNA template to guide the repair, thus  
122 by providing a single-stranded DNA (ssDNA) template, one can either insert a sequence of  
123 interest (e.g. allelic exchange) or generate larger and more precise deletions (Hisano et al.,  
124 2015; Kimura et al., 2014; Li et al., 2019; Wierson et al., 2020).

125

126 Here, CRISPR/Cas9-mediated knockout was employed using these two approaches - NHEJ  
127 and HDR - to respectively target coding and non-coding regions. First, exons 1 and 3 of the  
128 *oca2* coding sequence were targeted with sgRNAs with the intent of generating frameshift  
129 coding mutations. Second, an HDR ssRNA template was used to generate a ~1,100 bp

130 deletion in the 3' untranslated region (UTR) of *oca2*. More specifically, two sgRNA target  
131 sequences were identified – one at either end of a ~1,100 bp region in the 3' UTR. These were  
132 then co-injected with a 100 bp ssDNA DNA template that was mutually homologous to 50bp  
133 at either target site. This ssDNA template facilitates homology directed repair (HDR) to replace  
134 the region in between the target sites with a deletion (Li et al., 2019).

135

136 Using these two approaches, we generated coding and non-coding *oca2* *A. calliptera* mutants  
137 using site directed disruption with CRISPR/Cas9. As expected, loss of *oca2* function results  
138 in amelanism due to the inability to synthesise melanin. The deletion in the 3' UTR region  
139 yielded no visible phenotypic effect. Coding and non-coding mutations were successfully  
140 transmitted to the next generation. The establishment of CRISPR/Cas9 methodologies in *A.*  
141 *calliptera* provides a platform for the future analysis of coding and regulatory variation in one  
142 of the most astonishing vertebrate adaptive radiations - Malawi cichlid fishes - and will  
143 enhance our understanding of the genomic basis of organismal diversity.

144 **Results**

145

146 **Site-directed disruption of *A. calliptera oca2* coding sequence**

147 To demonstrate the feasibility of genome editing in *A. calliptera*, we generated mutations in  
 148 the coding sequence of *oca2*. Two injection mixes were used, each containing two sgRNAs  
 149 with the intent to increase the chances of introducing mutation (Li et al., 2021). These were  
 150 co-injected with Cas9 protein into fertilised single-cell eggs (Figure 2A, Table S1). The first  
 151 mix contained sgRNA 1 and sgRNA 2 respectively targeting exon 1 and exon 3 (Figure 2A).  
 152 The second contained sgRNA 3 and sgRNA 4 both targeting exon 1 (Figure 2A). Exons near  
 153 the 5' end of the gene were selected to increase the chance of a frameshift mutation causing  
 154 a missense translation for most of the length of the protein sequence. Embryos were screened  
 155 at 4 days post fertilisation (dpf, 25°C) when the retinal pigment epithelium becomes pigmented  
 156 with melanin. Both injection mixes yielded mosaic individuals with an average survival rate of  
 157 28.5%. The percentage of mosaic individuals was variable ranging from 18% to 100% with an  
 158 average of 54% (Table 1).

159

160 **Table 1: Percentage of *oca2* mosaic individuals induced by CRISPR/Cas9 in G0s**

| Target                    | Injected | Survived         | Survival (%) | Mutant            | Mosaic frequency(%) |
|---------------------------|----------|------------------|--------------|-------------------|---------------------|
| #1 <i>oca2</i> exon 1 & 3 | 36       | 17               | 47           | 17                | 100                 |
| #2 <i>oca2</i> exon 1     | 35       | 7                | 20           | 4                 | 57                  |
| #3 <i>oca2</i> exon 1     | 53       | 11               | 21           | 2                 | 18                  |
| #4 <i>oca2</i> exon 1     | 25       | 9                | 36           | 4                 | 44                  |
| #5 <i>oca2</i> exon 1     | 55       | 15               | 27           | 6                 | 40                  |
| #6 <i>oca2</i> exon 1     | 20       | 4                | 20           | 4                 | 67                  |
|                           |          | Average Survival | 28.5         | Average mosaicism | 54                  |

161

162

163 To investigate if mutations are transmitted to the following generations, fish showing mosaic  
 164 phenotypes were raised to adulthood. From these G0 adult fish, 4 males were crossed with  
 165 WT females. In addition, we incrossed one *oca2* mosaic male with two *oca2* mosaic females  
 166 to obtain *oca2* mutants carrying two *oca2* coding knock-out alleles and hence with a visible  
 167 amelanistic phenotype in one generation (Table 2). The genotyping of sequencing products  
 168 derived from the progeny of crosses of male founder individuals with wild-type females showed  
 169 an average transmission rate of 49% (Table 2). The lowest transmission rate (none) was  
 170 detected in a male with low levels of phenotypic amelanistic mosaicism, whereas transmission

171 was highly effective for the other three mosaic males with extensive amelanism (40-78%). As  
 172 germline transmission was high, we were able to generate two incrosses between *oca2*  
 173 mosaic mutants that both generated amelanistic phenotypes. One of the incrosses generated  
 174 10 embryos all with amelanistic phenotypes. Since this mutation is recessive, this result  
 175 indicates that both progenitors exhibited a transmission rate of 100% for this clutch, generating  
 176 progeny carrying two *oca2* coding knock-out alleles. The second incross generated 10  
 177 embryos with only 2 showing the amelanistic phenotype, which implies a rate of 20%  
 178 transmission for one of the progenitors. Taken together, germline transmission was high and  
 179 observed in all crosses where founders showed high levels of phenotypic amelanistic  
 180 mosaicism (Table 2).

181

182 **Table 2: Germline transmission of 6 founder crosses for the *oca2* loss of function**  
 183 **mutations**

| Group                                                                                                                   | Founder cross                                         | #F1s tested | Positive individuals | Germline transmission (%) |
|-------------------------------------------------------------------------------------------------------------------------|-------------------------------------------------------|-------------|----------------------|---------------------------|
| <b><i>oca2</i> mosaic male x with WT females: Germline transmission quantified by PCR genotyping</b>                    |                                                       |             |                      |                           |
| #1 <i>oca2</i> exon 1                                                                                                   | <i>oca2</i> <sup>♂1</sup> x wt <sup>♀</sup>           | 9           | 7                    | 78                        |
| #2 <i>oca2</i> exon 1 & 3                                                                                               | <i>oca2</i> <sup>♂2</sup> x wt <sup>♀</sup>           | 9           | 0                    | 0                         |
| #3 <i>oca2</i> exon 1 & 3                                                                                               | <i>oca2</i> <sup>♂3</sup> x wt <sup>♀</sup>           | 9           | 7                    | 78                        |
| #4 <i>oca2</i> exon 1 & 3                                                                                               | <i>oca2</i> <sup>♂4</sup> x wt <sup>♀</sup>           | 9           | 3                    | 33                        |
|                                                                                                                         |                                                       |             | Average transmission | 28                        |
| <b>Mosaic <i>oca2</i> x Mosaic <i>oca2</i>: Germline transmission quantified by presence of amelanistic individuals</b> |                                                       |             |                      |                           |
| #5 <i>oca2</i> exon 1                                                                                                   | <i>oca2</i> <sup>♂5</sup> x <i>oca2</i> <sup>♀1</sup> | 10          | 10                   | 100                       |
| #6 <i>oca2</i> exon 1                                                                                                   | <i>oca2</i> <sup>♂5</sup> x <i>oca2</i> <sup>♀2</sup> | 10          | 2                    | 20                        |
|                                                                                                                         |                                                       |             | Average transmission | 60                        |

184

185

186 Sequence analysis of the F1 progeny resulting from crosses #1, #3 and #4 (Table 2) shows  
 187 that both injection mixes resulted in deletions of variable sizes ranging from 1 bp to 21 bp  
 188 deletions (Figure 2B, C and D). The F1 progeny from cross #3 and #4, resulting from  
 189 microinjections using sgRNA1 and sgRNA2, that respectively target exon 1 and exon 3 (Figure

190 2B and C), show that these two guides have different germline transmission rates, with  
 191 sgRNA1 presenting a higher frequency (67% for #3 & 33% #4) than sgRNA2 (44% for #3 &  
 192 22% for #4) (Supplementary File 1). For cross #3 the transmission rates for each individual  
 193 guide are lower than the calculated rate for when the two are combined (Table 1, cross #3 and  
 194 #4), showcasing the benefits of injecting several guides in combination. This is further  
 195 strengthened by the genotyping results from cross #1, which shows that only one of the two  
 196 guides injected resulted in indels (sgRNA 4, Figure 2D).

197  
 198

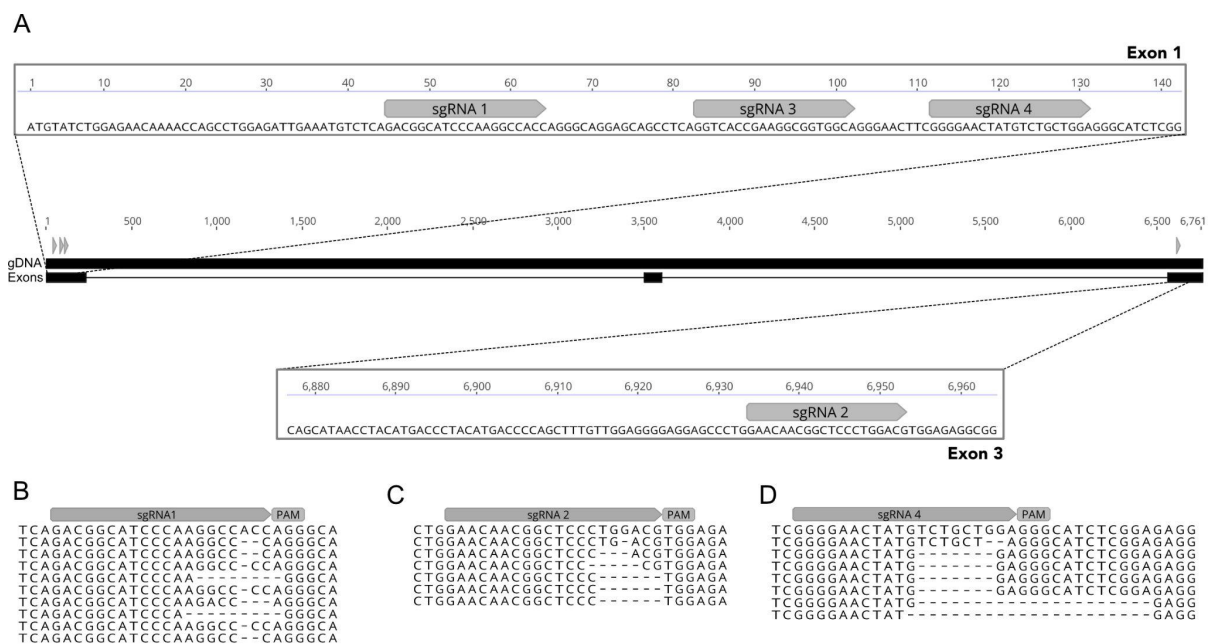

199  
 200

201 **Figure 2:** Efficient indel generation of *oca2* coding sequence by Crispr/Cas9. **A)** Four sgRNAs  
 202 were designed to cut the genomic sequence at exon 1 and exon 3. Two injection mixes were  
 203 used, one containing sgRNA1 and sgRNA2 targeting exon 1 and exon 3, and the other  
 204 containing sgRNA3 + sgRNA 4 both targeting exon 1. Alignment of mutant F1 individuals  
 205 derived from crosses #1, #3 and #4 are shown for **B)** sgRNA1, **C)** sgRNA2 and **D)** sgRNA4.  
 206 All F1 individuals were wild-type at the cut site of sgRNA3.

207  
 208

### 209 Deletion of *A. calliptera oca2* 3' untranslated region

210 The majority of a given organismal genome is non-coding in nature and regulates the timing  
 211 and location of gene expression and transcript stability. It has been repeatedly shown that  
 212 non-coding sequence divergence contributes greatly to cichlid diversity (Baldo et al., 2011;  
 213 Brawand et al., 2014; Kratochwil et al., 2018; O'Quin et al., 2011). For example, the  
 214 comparison of the first five cichlid reference genomes showed an abundance of non-coding



215 element divergence and found that transposable element insertions upstream of transcription  
 216 start sites were associated with expression divergence (Brawand et al., 2014). Further, 3'  
 217 UTRs also act as key regulators of gene expression, containing binding sites for microRNAs  
 218 and RNA-binding proteins (Mayr, 2017). The investigation of cichlid microRNA genes detected  
 219 signatures of divergent natural selection in microRNA target sites among Lake Malawi cichlids  
 220 (Loh et al., 2011). A comparative transcriptome analysis has further revealed little divergence  
 221 at protein-coding sequences, but a high diversity in UTRs (Baldo et al., 2011). Taken together,  
 222 these studies suggest that regulatory evolution plays a key role in cichlid diversification. Thus,  
 223 it is important to establish a protocol that allows for testing of the function of non-coding regions  
 224 associated with trait variation. For this purpose, we took advantage of the HDR CRISPR/Cas9  
 225 method to generate a large deletion in the 3' UTR region of *oca2*.

226  
 227 First, two sgRNA target sequences were identified – one at either end of a 1,096 bp region  
 228 (Figure 3A). Then, a 100 bp ssDNA repair template was designed to be homologous to the  
 229 flanking regions of each target site (50 bp upstream and 50 bp downstream), in order to mimic  
 230 a deletion when compared to the wild-type sequence (Figure 3A). A mix of the two sgRNAs,  
 231 the ssDNA together with Cas9 protein was microinjected into fertilised single-cell eggs (Table  
 232 S1). As there was no observable phenotype, the number of mosaic 3' UTR deletion mutants  
 233 was assessed by PCR and Sanger sequencing using two primers flanking the cut sites (207  
 234 bp upstream the left cut site and 400bp downstream of the right cut site) (Table S2). This  
 235 assay differentiates between the wild-type individuals and individuals carrying the desired  
 236 deletion. PCR on wild-type individuals results in only one PCR fragment, whereas mosaic  
 237 individuals carrying the deletion will show two fragments - the wild-type sequence (~1,715 bp)  
 238 and the sequence containing the deletion (~624 bp). Using this assay, we determined that the  
 239 percentage of mosaic individuals was 25% and 0% in the two clutches injected, with the  
 240 presence of only one positive mosaic mutant (Table 3).

241

242 **Table 3: Percentage of *oca2* 3' UTR mosaic mutants induced by CRISPR/Cas9 in G0s**

| Target                | Injected | Survived         | Survival (%) | Mutant            | Mosaic frequency(%) |
|-----------------------|----------|------------------|--------------|-------------------|---------------------|
| #1 <i>oca2</i> 3' UTR | 20       | 4                | 20           | 1                 | 25                  |
| #2 <i>oca2</i> 3' UTR | 58       | 3                | 10           | 0                 | 0                   |
|                       |          | Average Survival | 15           | Average mosaicism | 12.5                |

243

244 **Table 4: Germline transmission of one founder cross for the *oca2* 3' UTR deletion**

| Group                 | Founder cross                         | #F1s tested | Positive individuals | Germline transmission (%) |
|-----------------------|---------------------------------------|-------------|----------------------|---------------------------|
| #1 <i>oca2</i> 3' UTR | <i>oca2 utr</i> ♂ <sup>6</sup> x wt ♀ | 13          | 5                    | 38                        |

245  
246 To determine if deletions are transmitted to the following generations, the G0 mosaic individual  
247 for the deletion was raised to adulthood. This *oca2* 3' UTR mosaic mutant male was crossed  
248 with wild-type individuals and showed a germline transmission of 38% (Table 4). We  
249 genotyped F1s deriving this cross and confirmed the presence of germline transmission for  
250 the deletion. Sequencing of G0 and F1 individuals further confirmed the presence of deletions  
251 between the two target sites. The G0 founder shows the presence of a deletion and 5 out of  
252 13 F1s inherited mutations (Figure 3B). While two of the F1s (F1\_#1 and F1\_#8) have a  
253 precise deletion, the other three show the deletion (F1\_#5, F1\_#7 and F1\_#13) followed by a  
254 ~100bp downstream insertion (Figure 3B). This insertion shows homology to the HDR  
255 template which was potentially inserted - knocked-in - as part of the repair mechanism (Figure  
256 S1). These results show that the deletion of large non-coding fragments was successful in *A.*  
257 *calliptera*, but careful screening and sequencing of F1s is required to confirm the presence of  
258 precise nature of the deletions. The injection of different sgRNA and HDR template  
259 combinations, using larger clutches and screening more F1s will contribute to the refinement  
260 of this technique.

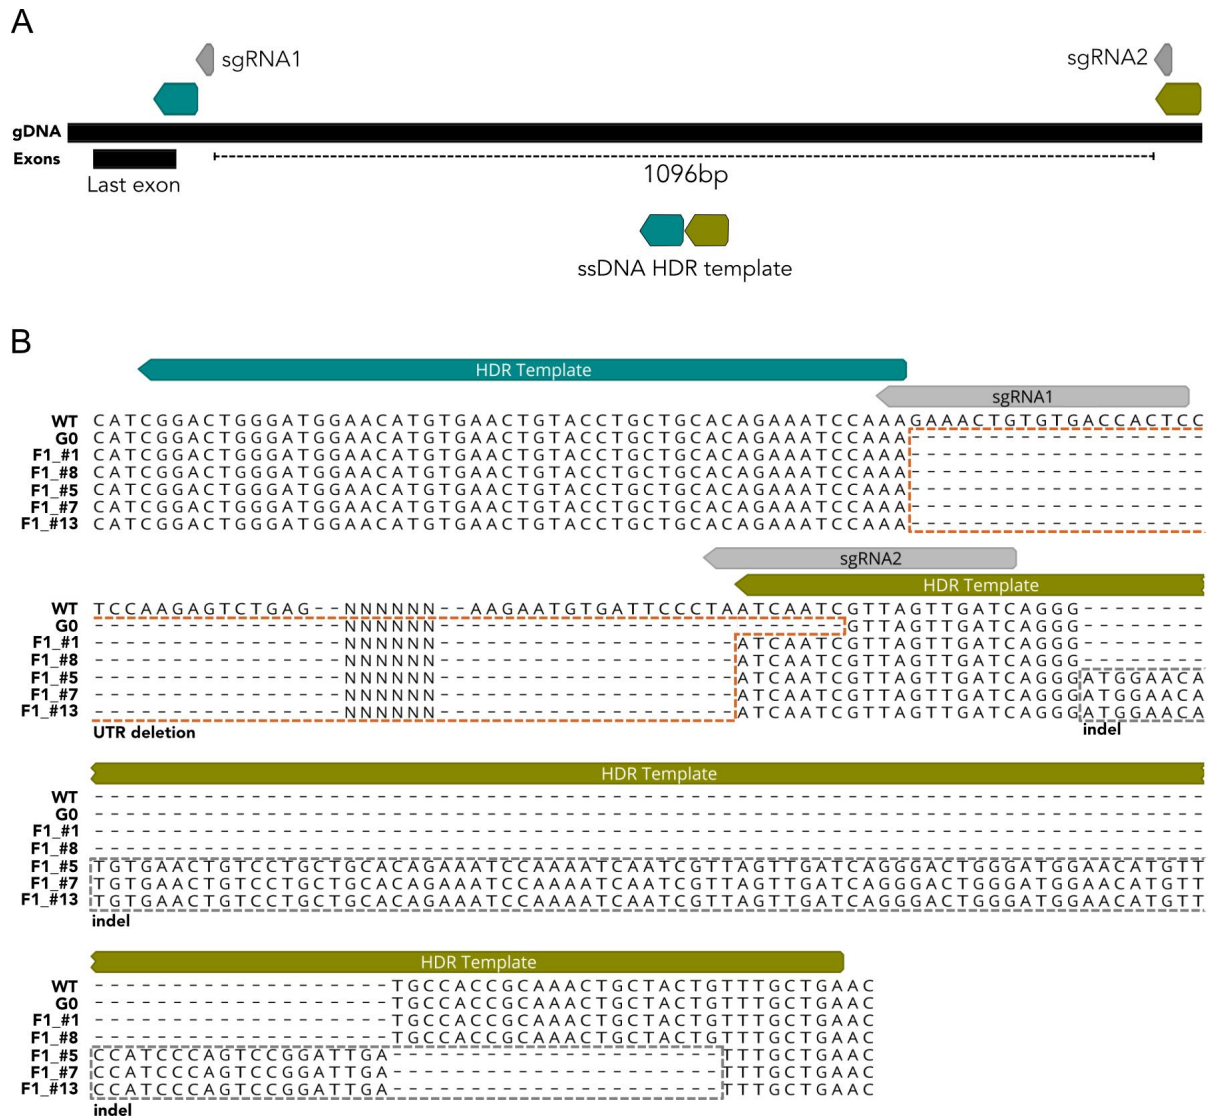

261

262

263 **Figure 3:** Large deletion of *oca2* 3' UTR sequence (~1096bp) using one pair of sgRNAs (grey

264 boxes) and one ssDNA HDR template. **A)** A single stranded HDR template with 50 bp left and

265 right homology arms (blue and green boxes respectively) were co-injected with two sgRNAs

266 flanking the desired deletion sites. **B)** Sequencing of the PCR products confirmed the deletion

267 in the G0 and F1s. The 3' UTR deletion is marked with an orange dashed box. In three of the

268 F1s (#5, #7 and #13) the deletion is followed by a downstream indel marked with a grey

269 dashed box.

270

271

### 272 **Phenotype of *oca2* coding and non-coding mutants in *A. calliptera***

273 In agreement with previous work in other model systems, *oca2* loss of function mutations led

274 to a reduction in melanic pigmentation. In wild-type embryos, yolk melanophores are the first

275 visible pigment cells to appear on the embryo (Figure 4A), and they remain on the yolk until

276 body wall closure. As such, the first observed phenotype in embryos injected with sgRNAs  
277 targeting the *oca2* coding sequence was a reduction in visible yolk melanophore abundance  
278 at 4 days post fertilisation (dpf) (Figure 4B). In F1 fish with two *oca2* mutant alleles, there is a  
279 complete lack of pigmented melanophores at this stage (Figure 4C); this amelanic phenotype  
280 persists throughout development.

281

282 By 10 dpf the degree of melanic coverage along the body increases in wild-type larvae,  
283 particularly in the head region, where the yolk melanophores increase in number and are more  
284 densely packed. The retina becomes fully pigmented, harbouring both melanophores and  
285 iridophores (Figure 4D). On the contrary, *oca2* mosaic mutant larvae continue to have fewer  
286 visible melanophores appearing on either the head or on the yolk (Figure 4E) and none in F1  
287 fish with two mutant alleles (Figure 4F). Despite the lack of melanin pigment, the retinae of  
288 *oca2* mutant larvae are bright and iridescent indicating the presence of iridophores (Figure 4E  
289 and 4F).

290

291 Throughout all stages of development described, there is no apparent difference in phenotype  
292 between wild-type embryos and the *oca2* 3' UTR deletion mosaic (Figure S2). Mosaic *oca2*  
293 coding knock-outs mutants continue to display a hypopigmented phenotype as adults (Figure  
294 5) while the mosaic *oca2* 3' UTR deletion mutant has a wild-type phenotype (Figure S3). This  
295 result has to be taken with caution as only one G0 individual tested positive for the deletion  
296 (Table 3) and may carry very few cells with biallelic mutations. The generation of homozygous  
297 mutants is required to fully comprehend the phenotypic effects of the 3' UTR deletion.

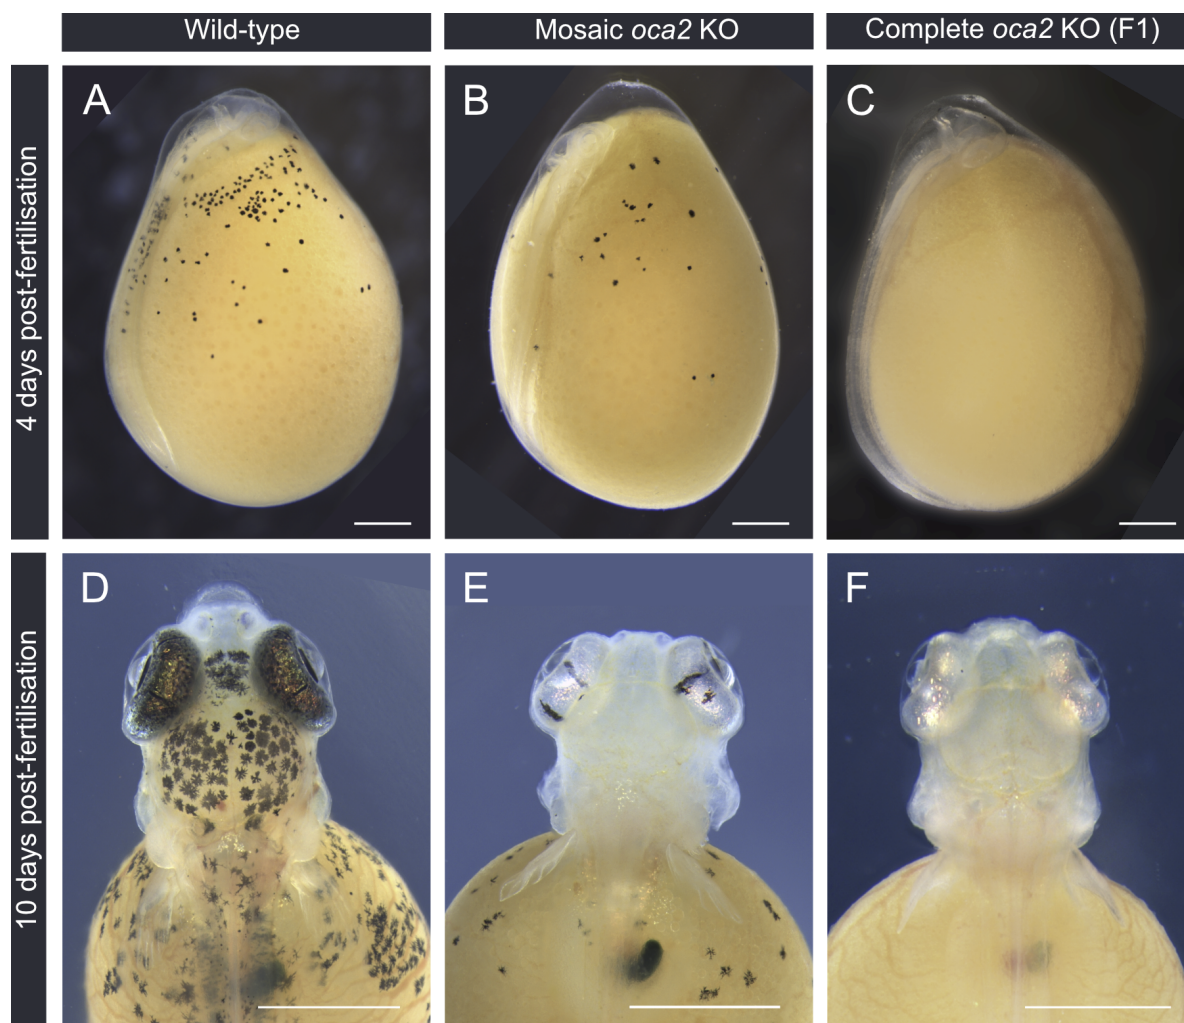

298

299

300 **Figure 4:** *oca2* loss of function embryonic phenotypes (25° C). **A-C)** Embryo development at  
301 4 days post fertilisation and; **D-F)** 10 days post fertilisation for wild-type (A, D), mosaic G0 (B,  
302 E), and F1 *oca2* coding knock-out embryos (C, F). Scale bar 1 mm.

303

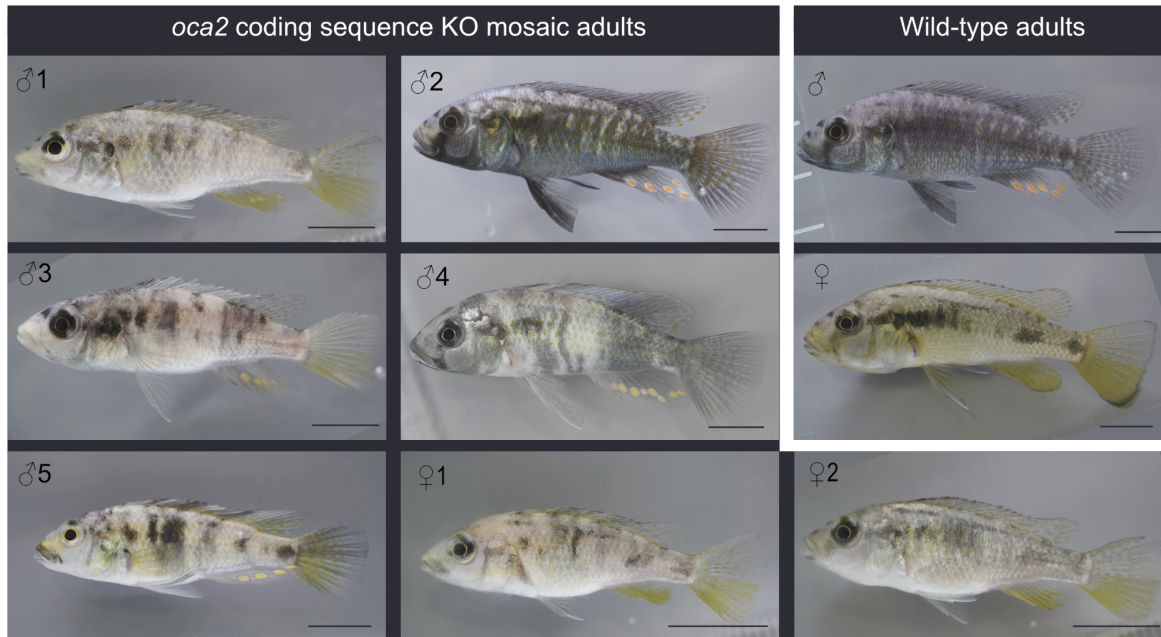

304

305 **Figure 5:** *oca2* coding sequence G0 adult phenotypes. Mosaic injected *oca2* coding region  
306 knock-outs compared to wild-type adults. Individual numbering corresponds to Table 2. Scale  
307 bar 1 cm

308

309

310 F1 adult fish with two *oca2* coding knock-out alleles have a typical amelanistic phenotype, with  
311 a complete absence of black pigmentation (Figure 6). We refer to this phenotype as  
312 amelanistic rather than albinistic because albino individuals lack both melanin and other  
313 pigments, though this is inconsistently applied across vertebrate taxa (Kratochwil et al., 2019).  
314 We compared the pigmentation patterns to the siblings of amelanistics: as the offspring of a  
315 cross between two mosaic mutant fish, these siblings may either be homozygous wild-type or  
316 heterozygous for the *oca2* coding knock-out which also has a wild-type phenotype (Beirl et al.,  
317 2014). In amelanistic adults, lack of pigmented melanophores in the eyes gives the retina a  
318 red appearance and black pigmentation patterns on the body and fins are absent, which  
319 includes the faint vertical bars on the trunk (Figure 6 A-B), solid black patch on the operculum  
320 (Figure 6 C-D), the black bar across the eye in males (Figure 6 C-D), the skin throughout the  
321 trunk (Figure 6 E-F), the anterior of the dorsal fin (Figure 6 G-H), and the base, spines, and  
322 edges of the caudal fin (Figure 6 I-J). Across the whole body there is greater yellow/orange  
323 pigmentation visible and exclusively black areas in wild-type are instead bright and reflective  
324 in the amelanistic individuals. The close-up pattern on the body of alternating light and dark  
325 patches is maintained in amelanistic adults (Figure 6 E-F). Interestingly, in this pattern the  
326 blue regions of the wild-type appear white in the amelanistic, and red erythrophores present  
327 in the amelanistic individuals are not visible in the wild-type (Figure 6 E-F).

328

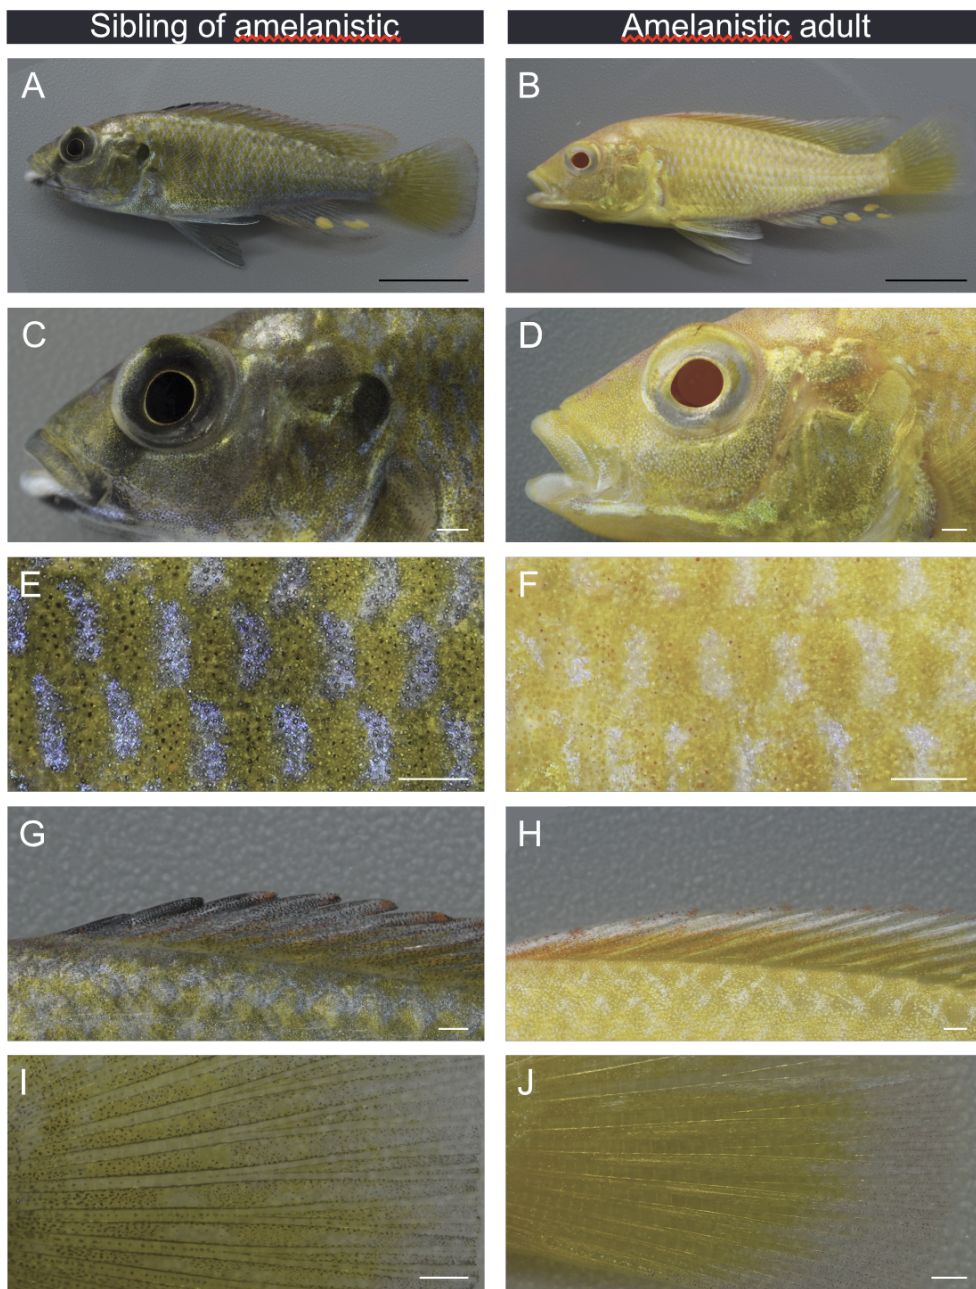

329

330 **Figure 6:** *oca2* amelanistic phenotype of adults. Comparison of F1s with wild-type and  
331 amelanistic appearance. **A-B)** full body **C-D)** head **E-F)** close-up of anterior trunk **G-H)** dorsal  
332 fin anterior **I-J)** caudal fin close-up of central spines, base of fin to the left and distal edge at  
333 the right. Scale bars 1 cm A-B and 1mm C-J.

334

335

## 336 Discussion

337

338 Mapping genotypic variation to phenotypic variation is one of the major goals of evolutionary  
339 biology. Hence, a multitude of candidate loci underlying adaptive trait variation have been  
340 identified in a wide range of organisms (Courtier-Orgogozo et al., 2020). Most of these studies  
341 are performed in species harbouring natural variation but that are typically considered non-  
342 model systems due to the lack of tractable genetic tools. The recent development of genome  
343 editing tools such as CRISPR/Cas9 is thus revolutionising the field of evolutionary biology,  
344 allowing for candidate gene function tests in virtually any organism and uncovering the  
345 genomic and developmental basis of adaptation and diversification. In this study, we adapted  
346 existing protocols to establish CRISPR/Cas9 genome editing in the cichlid fish *Astatotilapia*  
347 *calliptera*. We generated both coding and non-coding mutations in *oca2* that were efficiently  
348 transmitted through the germline to the next generation. To our knowledge, this is the first  
349 report of successfully targeting gene function in this species or any cichlid within the Malawi  
350 radiation, and as such, represents the first step towards testing the genes and regulatory  
351 elements underlying variation in the Malawi cichlid radiation.

352

353 The amelanistic phenotype of *oca2* is expected given the role of *oca2* in tyrosinase transport  
354 for melanin production and melanosome maturation in melanophores (Beirl et al., 2014; Costin  
355 et al., 2003; Manga et al., 2001). This demonstrates that *oca2* is a useful first gene to target  
356 for establishing and refining CRISPR/Cas9 editing in a new species: it is easy to screen for  
357 mutations as with other melanin synthesis pathway genes (Li et al., 2021). Similarly to  
358 *Tyrosinase* knock-outs in the Lake Tanganyika cichlid *Astatotilapia burtoni* (Li et al., 2021),  
359 this *oca2* mutant line would permit unobstructed imaging of subdermal structures and  
360 fluorophores *in situ* during embryo development, enabling inter-specific comparisons for such  
361 studies.

362

363 Despite the lack of melanin, typical colour patterns are still noticeable on amelanistic *A.*  
364 *calliptera*. As teleost fish colour patterns self-organise through interaction between different  
365 pigment cells, this suggests that unpigmented melanophores are still present and contributing  
366 to pattern formation (Patterson and Parichy, 2019). However, *oca2*-deficient zebrafish also  
367 show an increase in iridophore numbers suggesting that the loss of *oca2* could affect other  
368 pigment cells (Beirl et al., 2014). We consider both of these possibilities when interpreting the  
369 amelanistic colouration phenotype. For example, the switch from blue to white reflective  
370 colouration in the alternating patches on the trunk indicates that black pigment is a component  
371 of blue colouration in *A. calliptera* (Figure 6). The mechanism may be similar to colouration in  
372 Siamese fighting fish (*Betta splendens*) where melanophores enhance the chroma and purity



373 of the blue colour when underlying iridophores (Amiri and Shaheen, 2012). Alternatively or  
374 additively, the colour switch could be due to the loss of an influence of melanophores on  
375 iridophores, as zebrafish melanophores may induce iridophores to change shape and colour  
376 from white and dense to blue and loose (Owen et al., 2020). Similarly, the greater visible  
377 yellow/orange colouration due to xanthophores, red erythrophores, and bright reflective  
378 patches of iridophores in amelanistics could be due to melanin obscuring this pigmentation in  
379 wild-types (Figure 6). In some cichlid species superficial melanophores are found in the  
380 dermis, above the hypodermis (Beeching et al., 2013) so it is possible that they cover other  
381 pigment cells in *A. calliptera*. Alternatively, there may be greater numbers of these cell types  
382 in the amelanistic individuals. Comparison of the number and type of pigment cells during wild-  
383 type and amelanistic development may provide initial insights into chromatophore interactions  
384 in cichlids.

385  
386 Here, we targeted coding and non-coding *oca2* sequences demonstrating that despite low  
387 embryonic survival, mosaic mutants and germline transmission occurs at an efficient rate.  
388 Embryo survival was low, averaging 20%, with most deaths occurring due to perforation of the  
389 yolk and its subsequent leakage. This low survival is comparable to the microinjection survival  
390 rates observed in other cichlids (20% in *Oreochromis niloticus* and 30% in *Astatotilapia*  
391 *burtoni*) (Li et al., 2021, 2014). Despite the low survival, mosaic mutant generation occurred  
392 at a high rate. Mosaic frequency was higher for coding sequence mutants (~50%) than for the  
393 non-coding deletion mutants (~12.5%). This likely reflects the lower efficiency of the HDR  
394 mechanism compared with NHEJ (Mao et al., 2008). Alternatively, this result may also reflect  
395 locus-dependent differences in mutation rate. To distinguish between the two hypotheses, a  
396 comparison between HDR and NHEJ modifications at the same locus is required.  
397 Nonetheless, we observed transmission of mutations to the next generation in both cases. *A.*  
398 *calliptera* species reach maturity on average at 8 months at which point they usually lay on  
399 average ~20 eggs, with clutch size increasing with age and size (Parsons et al., 2017). Despite  
400 low survival and low clutch sizes at young ages, germline transmission is high and as such it  
401 is possible to establish a breeding population of stable mutant *A. calliptera* within 16 months.  
402 One possibility to increase spawning frequency and increase clutch sizes to maximise the  
403 number of mutants, is peritoneal injections of Ovaprim, a commercially available mixture of  
404 gonadotropin-releasing hormone analogue and a dopamine receptor antagonist. Such  
405 injections resulted in a reduction in spawning interval by five days and a 2-fold increase in egg  
406 yield in *Astatotilapia burtoni* (Li et al., 2021). A similar effect would be expected in *A. calliptera*.  
407  
408 We were able to verify successful deletion of a ~1100bp stretch of the *oca2* 3' UTR via HDR.  
409 However, whilst we could detect precise deletions in the G0 mutant and in two F1 individuals,

410 some F1 progeny also contained a ~100bp indel. This insertion was likely the result of  
411 erroneous integration of fragments of the HDR template, as some regions shared homology  
412 with the template but in random orientations. Erroneous integration of HDR template  
413 fragments has been reported in CRISPR/Cas9-mediated HDR in other species including  
414 zebrafish, in which frequency of template integration was found to influence overall knock-in  
415 efficiency (Boel et al., 2018). In future applications, refinement of HDR template composition  
416 and chemical impairment of the NHEJ pathway may improve HDR efficiency in *A. calliptera*  
417 (Maruyama et al., 2015).

418

419 Genome editing in this species is particularly relevant on many fronts. First, this species is  
420 highly diverse, inhabiting a range of habitats (lacustrine and riverine) and showing extensive  
421 populational variation in several morphological, physiological and life history traits (Parsons et  
422 al., 2017). *A. calliptera* 'masoko' in particular, is a key example of ongoing sympatric  
423 speciation, with two divergent ecomorphs differing in depth habitat and dietary preferences  
424 and many other morphological traits, such as male colour, craniofacial profile and pharyngeal  
425 jaws. These differences are associated with assortative mating and local adaptation providing  
426 a good setup to address the early stages of adaptive diversification within the context of both  
427 natural and sexual selection. Further, there are plenty of genomic resources for this species,  
428 with a reference genome assembly at the chromosomal level and with hundreds of low  
429 coverage genomes distributed across several populations (Malinsky et al., 2018, 2015; Munby  
430 et al., 2021). These genomic resources combined with the genome editing tools and *A.*  
431 *calliptera* amenability to the lab allows for the tackling of adaptive diversification from both the  
432 genomic and developmental point of view. Additionally, it has also been suggested that the  
433 Malawi cichlid radiation initially stemmed from a generalist *Astatotilapia*-type lineage. The ~  
434 850 Malawi cichlid species can be grouped into seven eco-morphological groups, resulting  
435 from three separate cichlid radiations that stemmed from a generalist *Astatotilapia*-type  
436 lineage (Figure 1A) (Joyce et al., 2011; Malinsky et al., 2018). The divergence started with the  
437 split of the pelagic genera *Rhamphochromis* and *Diplotaxodon*, followed by the shallow- and  
438 deep-water benthic species, as well as the utaka lineage (water column shoaling cichlids), and  
439 finally the split of mbuna (rock dwelling cichlids). The ancestor of these three radiations was,  
440 most likely, very similar to *A. calliptera*, in terms of ecology and phenotype (Malinsky et al.,  
441 2018). As such, *A. calliptera* is a useful model in which to develop functional tools to explore  
442 Malawi cichlid explosive diversification.

443

444 An important attribute of Malawi cichlids is the ease of establishing inter-specific crosses for  
445 genetic mapping of traits of interest. Using such an approach, several studies identified genes  
446 associated with inter-specific variation in craniofacial profiles, jaw attributes, colour patterns

447 and sex determination systems. The increase in genomic resources and the low costs of whole  
448 genome sequencing are also leading to an increase in genome-wide association studies in  
449 wild populations giving unprecedented insights into intraspecific variation (Kautt et al., 2020;  
450 Munby et al., 2021). A commonality between all these studies is that often the causal variants  
451 are in non-coding regions, hence establishing methods to edit non-coding regions will facilitate  
452 the dissection of their functional role. Here, both non-coding and coding sequence editing  
453 protocols are suited for loss of function experiments. The next step is to establish the targeted  
454 introduction of specific mutations using a knock-in approach, whereby a genomic variant  
455 associated with variation across species can be transferred from one species to the other.  
456 This approach will provide the causative link between genotype and phenotype variation and  
457 provide a genetic and developmental mechanism as to how organismal variation emerges.

458

459

## 460 **Conclusion**

461 In summary, we have demonstrated the successful targeting of coding and non-coding  
462 sequences in the cichlid *A. calliptera* using CRISPR/Cas9. As the extant species of the lineage  
463 ancestral to the lake Malawi cichlid radiation, and as a very diverse species complex itself, *A.*  
464 *calliptera* is an ideal species with which to test hypotheses regarding speciation, adaptation  
465 and trait diversification. The establishment of genome editing tools for such key non-model  
466 species promises to reveal novel genetic and developmental mechanisms by which  
467 organismal diversity emerges.

468

469 **Supplementary Figures**

470

471

472

473

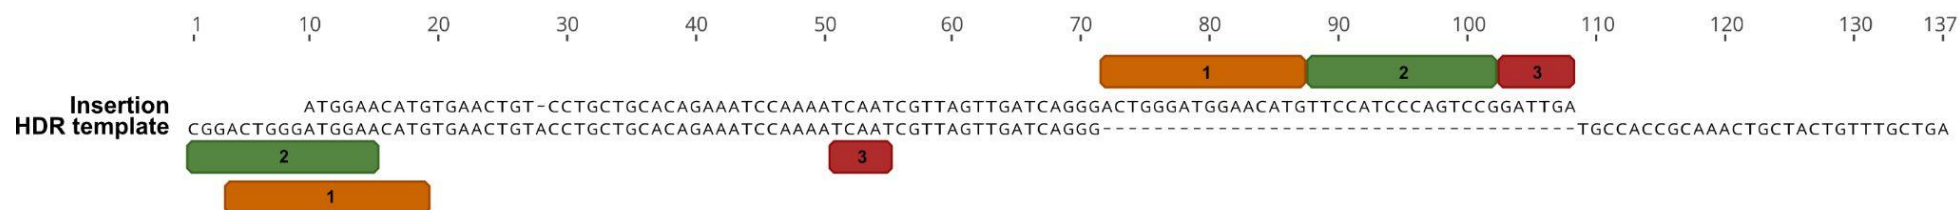

474

475

476 **Figure S1:** The HDR template and the insertion in *oca2* 3' UTR mutants (F1\_#5, F1\_#7 and F1\_#13) shows a high degree of homology. Part of  
477 the insertion that does not align with the HDR template sequence (coloured boxes 1, 2 and 3) shows homology with different upstream regions  
478 of the HDR template (coloured boxes 1, 2 and 3).

479

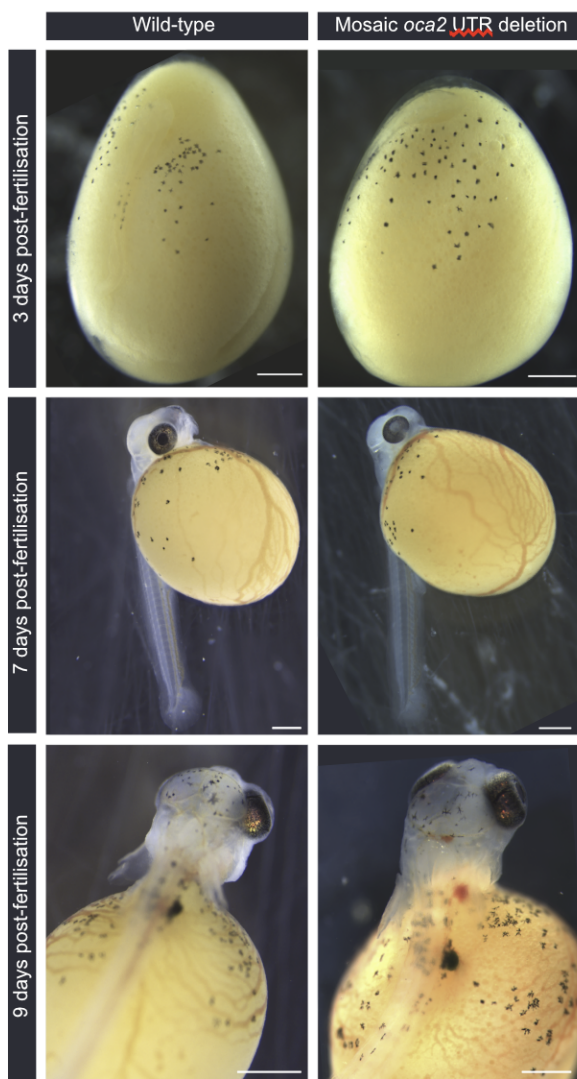

480

481 **Figure S2:** *oca2* 3' UTR embryonic G0 phenotype.

482

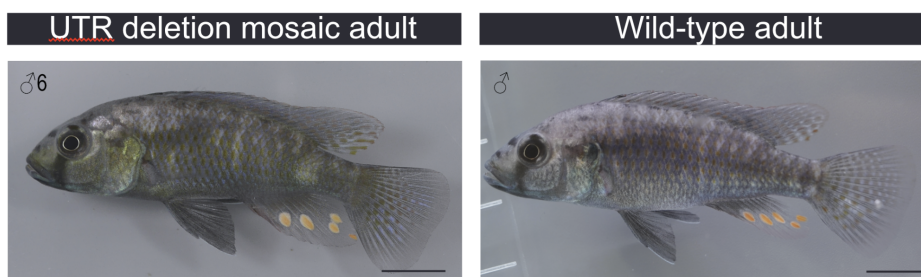

483

484 **Figure S3:** *oca2* 3' UTR G0 adult phenotype. Numbering corresponds to table 4.

## 485 **Methods**

486

### 487 **Fish maintenance and crossing**

488 *Astatotilapia calliptera* were kept under constant conditions ( $28 \pm 1^\circ\text{C}$ , 12 h dark/light cycle,  
489 pH 8) in 220 L tanks. All animals were handled in strict accordance with the protocols listed in  
490 the Home Office project licence PCA5E9695. Fish were fed twice a day with cichlid flakes  
491 and pellets (Vitalis). Tank environment was enriched with plastic plants, hiding tubes, and tank  
492 bottoms were covered with sand. Males were provided with a clay pot in which they  
493 established a territory and spawned with gravid females. Males and females were housed in  
494 the same tank but separated by a divider to control the timing of spawning. Males were housed  
495 singly, while females were kept in groups of 8-15 females. On the day of spawning, the divider  
496 was removed, and interactions were monitored for spawning. If spawning was detected, the  
497 fish were given an additional 30 - 60 minutes to fertilise the eggs. The fertilized eggs were  
498 then removed from the female's buccal cavity and injected with sgRNAs and Cas9 protein.

499

500

### 501 **gRNA design and synthesis**

502 CRISPR/Cas9 targets were selected with the CHOPCHOP software online  
503 (<http://chopchop.cbu.uib.no/>) using the *Astatotilapia burtoni* genome as a reference. Basic  
504 local alignment search tool (BLAST) (Altschul et al., 1990) was then performed with the *A.*  
505 *calliptera* genome at Ensembl to confirm homology and avoid off-targets. sgRNAs used in this  
506 study start with GG or GA followed by N18, which are directly upstream of the NGG PAM  
507 sequence (5'-GG-N18-NGG-3' or 5'-GA-N18-NGG-3') to satisfy the requirements for *in vitro*  
508 transcription using a T7 or SP6 promoter respectively. We designed three sgRNA in exon 1  
509 (GACGGCATCCCAAGGCCACC, GGTCACCGAAGGCGGTGGCA and  
510 GGGGAACTATGTCTGCTGGA) one sgRNA in exon 3 (GAACAACGGCTCCCTGGACG) and  
511 two sgRNA in the UTR region (GAGTGGTCACACAGTTTCTT and  
512 GATCAACTAACGATTGATTA). The PCR primers for sgRNA synthesis are given in table S1.  
513 To synthesize sgRNAs we used the cloning free method described in Varshney et al. 2015  
514 using T7 or SP6 Polymerases (NEB) depending on the 5' sgRNA sequence. The sgRNAs  
515 were purified using the Qiagen RNeasy kit.

516

517

518

519

520

521

522 **Table S1: Oligo sequences used for sgRNA synthesis and ssDNA sequence.**

| Oligo name | Oligo sequence                                                                                          | Oca2 location |
|------------|---------------------------------------------------------------------------------------------------------|---------------|
| sgRNA1     | ATTTAGGTGACACTATAGACGGCATCCCAAGGCCACCGTTTTAGAGCTAGAAATAGC                                               | Exon 1        |
| sgRNA2     | ATTTAGGTGACACTATAGAACAACGGCTCCCTGGACGGTTTTAGAGCTAGAAATAGC                                               | Exon 3        |
| sgRNA3     | TAATACGACTCACTATAGGTCACCGAAGGCGGTGGCAGTTTTAGAGCTAGAAATAGC                                               | Exon 1        |
| sgRNA4     | TAATACGACTCACTATAGGGGAACTATGTCTGCTGGAGTTTTAGAGCTAGAAATAGC                                               | Exon 1        |
| sgRNA1_UTR | ATTTAGGTGACACTATAGAGTGGTCACACAGTTTCTGTTTTAGAGCTAGAAATAGC                                                | UTR           |
| sgRNA2_UTR | ATTTAGGTGACACTATAGATCAACTAACGATTGATTAGTTTTAGAGCTAGAAATAGC                                               | UTR           |
| ssDNA UTR  | TCAGCAAACAGTAGCAGTTTGCGGTGGCACCCCTGATCAACTAACGATTGATTTGGATTCTGT<br>GCAGCAGGTACAGTTCACATGTTCCATCCCAGTCCG | UTR           |

523

524

### 525 **Microinjection**

526 After collection eggs were placed into wells created by a mold with circular indentations in 2%  
 527 agarose made with tank water see Li et al. 2021 for more information on the mold). Single cell  
 528 embryos were injected with a mixture of sgRNAs at 300 ng/μl each, together with True Cut  
 529 Cas9 Protein V2 (Invitrogen) at 150 ng/μl and dextran labelled with TexasRed (ThermoFisher  
 530 Scientific, 10,000 MW) at 0.25%. Three injection mixes were used: 1) sgRNA1 and sgRNA2  
 531 targeting exons 1 and 3; 2) sgRNA3 and sgRNA4 targeting exon 1; or 3) sgRNAUTR1 +  
 532 sgRNAUTR2. To improve deletion efficiency, a 100bp ssDNA (IDT Technologies) with left and  
 533 right homology arms (Figure 3A) located at the outer sides of the Cas9 cutting sites was used  
 534 at 20 ng/ul. Microinjection needles were pulled manually from glass capillaries (GC100F-10,  
 535 1.0mm O.D; 0.58 mm I.D, Harvard Apparatus) using a Sutter P-97. Needles were opened by  
 536 gently tapping the needle on a Kimwipe to break the tip to a diameter of ~10 μm diameter.  
 537 Each egg was injected using a pulse-flow nitrogen injection system (MPPI-3 with a back  
 538 pressure unit) with 2 pulses at 1 ms and 40 psi (~1-2 nl). The injected embryos were kept  
 539 individually in 6 well plates, in an orbital shaker at 25°C in the presence of methylene blue (10  
 540 mg/ml) and with daily water changes.

541

### 542 **Germline transmission rates and F1 progeny genotyping of oca2 coding mutants**

543 Four mosaic oca2 mutant males were reared until adulthood and crossed with wildtype  
 544 females (Table 2). Germline transmission rates were quantified by genotyping potential F1  
 545 heterozygotes. DNA was extracted from 6-14 dpf embryos (after yolk removal) using the DNA  
 546 miniprep kit (Zymo). PCR products were amplified with Phusion (NEB), following the

547 manufacturer's specifications, with an annealing temperature of 62 °C. Primer sequences for  
548 exon 1 and exon 3 genotyping are listed in Table S2. PCR products were purified with  
549 QIAquick PCR Purification Kit (Qiagen). Presence of heterozygous mutants was then  
550 confirmed using Sanger sequencing. Sequence analysis was performed using the Synthego  
551 ICE CRISPR analysis tool (<https://ice.synthego.com/>). This tool infers CRISPR edit sites from  
552 sequences derived from heterozygous or mosaic individuals. A summary of the analysis of  
553 Sanger sequencing fragments is detailed in Supplementary File 1. Sequence traces were  
554 analysed on Geneious Prime to detect sequence quality drops associated with the sgRNA cut  
555 site. Further, mutant sequences were extracted using the ICE CRISPR analysis tool by  
556 selecting the most frequent mutant allele and aligned with the MAFFT alignment plugin on  
557 Geneious Prime (Figure 2B, C and D). Two *oca2* mosaic coding mutant females were  
558 incrossed with one *oca2* mosaic male to generate F1s with two *oca2* mutant alleles. Germline  
559 transmission was inferred by visual quantification of the number of embryos lacking melanic  
560 pigmentation. These estimates probably represent an underestimation of transmission rates,  
561 since heterozygotes do not present an amelanistic phenotype.

562

563 **Table S2: PCR primers for genotyping**

| Oca2 location          | Forward                | Reverse                |
|------------------------|------------------------|------------------------|
| Exon 1 (sgRNA 1, 3 &4) | CTGCAGCAGTCTCACCATGTAT | GTAGTTACCCGTCCTCTTGTCG |
| Exon3 (sgRNA2)         | CCAGCATAACCTACATGACCCT | CAAATGGAGAAAAGAAGTTGGG |
| 3' UTR                 | TACTGCAGCCCGTAAATCTTTT | ATCGATCTGTGCTGCTGGAG   |

564

565

566 **Germline transmission rates and F1 progeny genotyping of *oca2* 3' UTR deletion**  
567 **mutants**

568 G0 mosaics and F1 heterozygous mutant progeny were assessed by PCR using two primers  
569 flanking the cut sites. The forward primer is located 207 bp upstream the left cut site and the  
570 reverse is 400 bp downstream of the right cut site (Table S2). This assay differentiates  
571 between the wild-type individuals and individuals carrying the desired deletion. PCR on wild-  
572 type individuals results in only one PCR fragment, whereas mosaic individuals carrying the  
573 deletion will show two fragments - the wild-type sequence (~1715bp) and the sequence  
574 containing the deletion (~624 bp). Only one G0 individual tested positive for the deletion. This  
575 G0 individual was crossed with wildtype females (Table 4). DNA was extracted from a fin clip  
576 of the G0 founder and from 8dpf F1 embryos (after yolk removal). PCR was performed with



577 OneTaq (NEB), following the manufacturer's specifications, with an annealing temperature of  
578 60 °C. PCR purification of the deletion fragments was performed with QIAquick Gel Extraction  
579 Kit (Qiagen). Presence of the deletion in the G0 and F1 individuals was then confirmed using  
580 Sanger sequencing. Sequences were aligned using the MAFFT alignment plugin on Geneious  
581 Prime (Figure 3B).

582

583

#### 584 **Embryo and adult imaging**

585 Embryos were imaged on a Leica M205 FCA stereoscope with a DFC7000T camera under  
586 reflected light darkfield. For each embryo, images were taken at multiple focal distances.  
587 These images were then focus-stacked using Helicon Focus or Photoshop to produce a single  
588 image with all cells in focus. To prevent movement between imaging different focal planes,  
589 post-hatching embryos were anaesthetised by submersion in 0.02% Tricaine  
590 methanesulphonate (Sigma-Aldrich E10521) for the duration of imaging (approximately 2  
591 minutes per embryo) with the yolk supported in a shallow well of solidified 1% low-melting  
592 agarose (Promega, V2111). Adult fish were photographed using a Panasonic DMC GX7  
593 camera with a Panasonic Lumix G 20mm pancake lens, in a photography tank containing a  
594 scale. Lighting conditions were standardised using two light sources, one either side of the  
595 camera, and a grey background.

596 **Author contribution**

597 BC, JE, AM and MES performed experiments and analysed the data. GFT, AMS and DJ  
598 contributed with fish stocks and initial experiment setup. MES, EAM and SAJ designed,  
599 provided resources and supervised the study. BC, JE and MES wrote the manuscript with  
600 contributions or feedback from all authors. All authors read and approved the final version of  
601 the manuscript.

602

603 **Competing interests**

604 The authors declare no competing interests.

605

606 **Additional information**

607 Supplementary File 1 contains information on the analysis of the mutant sequences.

608

609 **Acknowledgements**

610 We thank the Animal Technicians and NACWO at the UBS Cichlid fish facility in Madingley  
611 (Cambridge) for the help in rearing wildtype and mutant fish. Members of the Miska lab and  
612 Morphological Evolution Lab for technical support and discussion. BC and AM are supported  
613 by the Wellcome Trust PhD Programme in Developmental Mechanisms (222279/Z/20/Z and  
614 102175/Z/13/Z respectively). E.A.M. is supported by Cancer Research UK (C13474/A18583,  
615 C6946/A14492) and the Wellcome Trust (219475/Z/19/Z, 092096/Z/10/Z). SAJ is supported  
616 by the HFSP grant RGY0079/2018 and the NSF grant IOS-1825723. ES is supported by a  
617 NERC IRF NE/R01504X/1.

## 618 References

619

- 620 Altschul, S.F., Gish, W., Miller, W., Myers, E.W., Lipman, D.J., 1990. Basic local alignment  
621 search tool. *J. Mol. Biol.* 215, 403–410. [https://doi.org/10.1016/S0022-2836\(05\)80360-](https://doi.org/10.1016/S0022-2836(05)80360-2)  
622 2
- 623 Amiri, M.H., Shaheen, H.M., 2012. Chromatophores and color revelation in the blue variant of  
624 the Siamese fighting fish (*Betta splendens*). *Micron* 43, 159–169.  
625 <https://doi.org/10.1016/j.micron.2011.07.002>
- 626 Baldo, L., Santos, M.E., Salzburger, W., 2011. Comparative Transcriptomics of Eastern  
627 African Cichlid Fishes Shows Signs of Positive Selection and a Large Contribution of  
628 Untranslated Regions to Genetic Diversity. *Genome Biol. Evol.* 3, 443–455.  
629 <https://doi.org/10.1093/gbe/evr047>
- 630 Beeching, S.C., Glass, B.A., Rehorek, S.J., 2013. Histology of melanic flank and opercular  
631 color pattern elements in the firemouth cichlid, *Thorichthys meeki*. *J. Morphol.* 274,  
632 743–749. <https://doi.org/10.1002/jmor.20131>
- 633 Beirl, A.J., Linbo, T.H., Cobb, M.J., Cooper, C.D., 2014. *oca2* regulation of chromatophore  
634 differentiation and number is cell type specific in zebrafish. *Pigment Cell Melanoma*  
635 *Res.* 27, 178–189. <https://doi.org/10.1111/pcmr.12205>
- 636 Boel, A., De Saffel, H., Steyaert, W., Callewaert, B., De Paepe, A., Coucke, P.J., Willaert, A.,  
637 2018. CRISPR/Cas9-mediated homology-directed repair by ssODNs in zebrafish  
638 induces complex mutational patterns resulting from genomic integration of repair-  
639 template fragments. *Dis. Model. Mech.* 11, dmm035352.  
640 <https://doi.org/10.1242/dmm.035352>
- 641 Brawand, D., Wagner, C.E., Li, Y.I., Malinsky, M., Keller, I., Fan, S., Simakov, O., Ng, A.Y.,  
642 Lim, Z.W., Bezault, E., Turner-Maier, J., Johnson, J., Alcazar, R., Noh, H.J., Russell,  
643 P., Aken, B., Alföldi, J., Amemiya, C., Azzouzi, N., Baroiller, J.-F., Barloy-Hubler, F.,  
644 Berlin, A., Bloomquist, R., Carleton, K.L., Conte, M.A., D’Cotta, H., Eshel, O., Gaffney,  
645 L., Galibert, F., Gante, H.F., Gnerre, S., Greuter, L., Guyon, R., Haddad, N.S., Haerty,  
646 W., Harris, R.M., Hofmann, H.A., Hourlier, T., Hulata, G., Jaffe, D.B., Lara, M., Lee,  
647 A.P., MacCallum, I., Mwaiko, S., Nikaido, M., Nishihara, H., Ozouf-Costaz, C.,  
648 Penman, D.J., Przybylski, D., Rakotomanga, M., Renn, S.C.P., Ribeiro, F.J., Ron, M.,  
649 Salzburger, W., Sanchez-Pulido, L., Santos, M.E., Searle, S., Sharpe, T., Swofford,  
650 R., Tan, F.J., Williams, L., Young, S., Yin, S., Okada, N., Kocher, T.D., Miska, E.A.,  
651 Lander, E.S., Venkatesh, B., Fernald, R.D., Meyer, A., Ponting, C.P., Streebman, J.T.,  
652 Lindblad-Toh, K., Seehausen, O., Di Palma, F., 2014. The genomic substrate for  
653 adaptive radiation in African cichlid fish. *Nature* 513, 375–381.  
654 <https://doi.org/10.1038/nature13726>
- 655 Carleton, K.L., Dalton, B.E., Escobar-Camacho, D., Nandamuri, S.P., 2016. Proximate and  
656 ultimate causes of variable visual sensitivities: Insights from cichlid fish radiations.  
657 *genesis* 54, 299–325. <https://doi.org/10.1002/dvg.22940>
- 658 Costin, G.-E., Valencia, J.C., Vieira, W.D., Lamoreux, M.L., Hearing, V.J., 2003. Tyrosinase  
659 processing and intracellular trafficking is disrupted in mouse primary melanocytes  
660 carrying the underwhite (uw) mutation. A model for oculocutaneous albinism (OCA)  
661 type 4. *J. Cell Sci.* 116, 3203–3212. <https://doi.org/10.1242/jcs.00598>
- 662 Courtier-Orgogozo, V., Arnoult, L., Prigent, S.R., Wiltgen, S., Martin, A., 2020. Gephebase, a  
663 database of genotype–phenotype relationships for natural and domesticated variation  
664 in Eukaryotes. *Nucleic Acids Res.* 48, D696–D703. <https://doi.org/10.1093/nar/gkz796>
- 665 Edgley, D.E., Genner, M.J., 2019. Adaptive Diversification of the Lateral Line System during  
666 Cichlid Fish Radiation. *iScience* 16, 1–11. <https://doi.org/10.1016/j.isci.2019.05.016>
- 667 Edwards, M., Bigham, A., Tan, J., Li, S., Gozdzik, A., Ross, K., Jin, L., Parra, E.J., 2010.  
668 Association of the OCA2 Polymorphism His615Arg with Melanin Content in East Asian  
669 Populations: Further Evidence of Convergent Evolution of Skin Pigmentation. *PLOS*  
670 *Genet.* 6, e1000867. <https://doi.org/10.1371/journal.pgen.1000867>
- 671 Fang, J., Chen, T., Pan, Q., Wang, Q., 2018. Generation of albino medaka (*Oryzias latipes*)

- 672 by CRISPR/Cas9. *J. Exp. Zoolog. B Mol. Dev. Evol.* 330, 242–246.  
673 <https://doi.org/10.1002/jez.b.22808>
- 674 Hisano, Y., Sakuma, T., Nakade, S., Ohga, R., Ota, S., Okamoto, H., Yamamoto, T.,  
675 Kawahara, A., 2015. Precise in-frame integration of exogenous DNA mediated by  
676 CRISPR/Cas9 system in zebrafish. *Sci. Rep.* 5, 8841.  
677 <https://doi.org/10.1038/srep08841>
- 678 Höch, R., Schneider, R.F., Kickuth, A., Meyer, A., Woltering, J.M., 2021. Spiny and soft-rayed  
679 fin domains in acanthomorph fish are established through a BMP-gremlin-shh  
680 signaling network. *Proc. Natl. Acad. Sci.* 118.  
681 <https://doi.org/10.1073/pnas.2101783118>
- 682 Joyce, D.A., Lunt, D.H., Genner, M.J., Turner, G.F., Bills, R., Seehausen, O., 2011. Repeated  
683 colonization and hybridization in Lake Malawi cichlids. *Curr. Biol.* 21, R108–R109.  
684 <https://doi.org/10.1016/j.cub.2010.11.029>
- 685 Kautt, A.F., Kratochwil, C.F., Nater, A., Machado-Schiaffino, G., Olave, M., Henning, F.,  
686 Torres-Dowdall, J., Härer, A., Hulse, C.D., Franchini, P., Pippel, M., Myers, E.W.,  
687 Meyer, A., 2020. Contrasting signatures of genomic divergence during sympatric  
688 speciation. *Nature* 588, 106–111. <https://doi.org/10.1038/s41586-020-2845-0>
- 689 Kelsh, R.N., Barsh, G.S., 2011. A Nervous Origin for Fish Stripes. *PLOS Genet.* 7, e1002081.  
690 <https://doi.org/10.1371/journal.pgen.1002081>
- 691 Kimura, Y., Hisano, Y., Kawahara, A., Higashijima, S., 2014. Efficient generation of knock-in  
692 transgenic zebrafish carrying reporter/driver genes by CRISPR/Cas9-mediated  
693 genome engineering. *Sci. Rep.* 4, 6545. <https://doi.org/10.1038/srep06545>
- 694 Klaassen, H., Wang, Y., Adamski, K., Rohner, N., Kowalko, J.E., 2018. CRISPR mutagenesis  
695 confirms the role of *oca2* in melanin pigmentation in *Astyanax mexicanus*. *Dev. Biol.,*  
696 *Cavefish Development* 441, 313–318. <https://doi.org/10.1016/j.ydbio.2018.03.014>
- 697 Kocher, T.D., 2004. Adaptive evolution and explosive speciation: the cichlid fish model. *Nat.*  
698 *Rev. Genet.* 5, 288–298. <https://doi.org/10.1038/nrg1316>
- 699 Kratochwil, C.F., Liang, Y., Gerwin, J., Woltering, J.M., Urban, S., Henning, F., Machado-  
700 Schiaffino, G., Hulse, C.D., Meyer, A., 2018. Agouti-related peptide 2 facilitates  
701 convergent evolution of stripe patterns across cichlid fish radiations. *Science* 362,  
702 457–460. <https://doi.org/10.1126/science.aaa6809>
- 703 Kratochwil, C.F., Urban, S., Meyer, A., 2019. Genome of the Malawi golden cichlid fish  
704 (*Melanochromis auratus*) reveals exon loss of *oca2* in an amelanistic morph. *Pigment*  
705 *Cell Melanoma Res.* 32, 719–723. <https://doi.org/10.1111/pcmr.12799>
- 706 Li, C.-Y., Steighner, J.R., Sweatt, G., Thiele, T.R., Juntti, S.A., 2021. Manipulation of the  
707 Tyrosinase gene permits improved CRISPR/Cas editing and neural imaging in cichlid  
708 fish. *Sci. Rep.* 11, 15138. <https://doi.org/10.1038/s41598-021-94577-8>
- 709 Li, M., Liu, X., Dai, S., Xiao, H., Wang, D., 2019. High Efficiency Targeting of Non-coding  
710 Sequences Using CRISPR/Cas9 System in Tilapia. *G3 Genes Genomes Genet.* 9,  
711 287–295. <https://doi.org/10.1534/g3.118.200883>
- 712 Li, Minghui, Yang, H., Zhao, J., Fang, L., Shi, H., Li, Mengru, Sun, Y., Zhang, X., Jiang, D.,  
713 Zhou, L., Wang, D., 2014. Efficient and Heritable Gene Targeting in Tilapia by  
714 CRISPR/Cas9. *Genetics* 197, 591–599. <https://doi.org/10.1534/genetics.114.163667>
- 715 Livraghi, L., Hanly, J.J., Van Bellghem, S.M., Montejo-Kovacevich, G., van der Heijden, E.S.,  
716 Loh, L.S., Ren, A., Warren, I.A., Lewis, J.J., Concha, C., Hebberecht, L., Wright, C.J.,  
717 Walker, J.M., Foley, J., Goldberg, Z.H., Arenas-Castro, H., Salazar, C., Perry, M.W.,  
718 Papa, R., Martin, A., McMillan, W.O., Jiggins, C.D., 2021. Cortex cis-regulatory  
719 switches establish scale colour identity and pattern diversity in *Heliconius*. *eLife* 10,  
720 e68549. <https://doi.org/10.7554/eLife.68549>
- 721 Loh, Y.-H.E., Yi, S.V., Strelman, J.T., 2011. Evolution of MicroRNAs and the Diversification  
722 of Species. *Genome Biol. Evol.* 3, 55–65. <https://doi.org/10.1093/gbe/evq085>
- 723 Malinsky, M., Challis, R.J., Tyers, A.M., Schiffels, S., Terai, Y., Ngatunga, B.P., Miska, E.A.,  
724 Durbin, R., Genner, M.J., Turner, G.F., 2015. Genomic islands of speciation separate  
725 cichlid ecomorphs in an East African crater lake. *Science* 350, 1493–1498.  
726 <https://doi.org/10.1126/science.aac9927>

- 727 Malinsky, M., Svoldal, H., Tyers, A.M., Miska, E.A., Genner, M.J., Turner, G.F., Durbin, R.,  
728 2018. Whole-genome sequences of Malawi cichlids reveal multiple radiations  
729 interconnected by gene flow. *Nat. Ecol. Evol.* 2, 1940–1955.  
730 <https://doi.org/10.1038/s41559-018-0717-x>
- 731 Manga, P., Boissy, R.E., Pifko-Hirst, S., Zhou, B.-K., Orlow, S.J., 2001. Mislocalization of  
732 Melanosomal Proteins in Melanocytes from Mice with Oculocutaneous Albinism Type  
733 2. *Exp. Eye Res.* 72, 695–710. <https://doi.org/10.1006/exer.2001.1006>
- 734 Mao, Z., Bozzella, M., Seluanov, A., Gorbunova, V., 2008. DNA repair by nonhomologous end  
735 joining and homologous recombination during cell cycle in human cells. *Cell Cycle* 7,  
736 2902–2906. <https://doi.org/10.4161/cc.7.18.6679>
- 737 Maruyama, T., Dougan, S.K., Truttmann, M.C., Bilate, A.M., Ingram, J.R., Ploegh, H.L., 2015.  
738 Increasing the efficiency of precise genome editing with CRISPR-Cas9 by inhibition of  
739 nonhomologous end joining. *Nat. Biotechnol.* 33, 538–542.  
740 <https://doi.org/10.1038/nbt.3190>
- 741 Mayr, C., 2017. Regulation by 3'-Untranslated Regions. *Annu. Rev. Genet.* 51, 171–194.  
742 <https://doi.org/10.1146/annurev-genet-120116-024704>
- 743 Munby, H., Linderoth, T., Fischer, B., Du, M., Vernaz, G., Tyers, A.M., Ngatunga, B.P.,  
744 Shechonge, A., Denise, H., McCarthy, S.A., Bista, I., Miska, E.A., Santos, M.E.,  
745 Genner, M.J., Turner, G.F., Durbin, R., 2021. Differential use of multiple genetic sex  
746 determination systems in divergent ecomorphs of an African crater lake cichlid. *bioRxiv*  
747 <https://doi.org/10.1101/2021.08.05.455235>
- 748 O’Gorman, M., Thakur, S., Imrie, G., Moran, R.L., Choy, S., Sifuentes-Romero, I., Bilandžija,  
749 H., Renner, K.J., Duboué, E., Rohner, N., McGaugh, S.E., Keene, A.C., Kowalko, J.E.,  
750 2021. Pleiotropic function of the *oca2* gene underlies the evolution of sleep loss and  
751 albinism in cavefish. *Curr. Biol.* 31, 3694–3701.e4.  
752 <https://doi.org/10.1016/j.cub.2021.06.077>
- 753 O’Quin, K.E., Smith, D., Naseer, Z., Schulte, J., Engel, S.D., Loh, Y.-H.E., Streelman, J.T.,  
754 Boore, J.L., Carleton, K.L., 2011. Divergence in cis-regulatory sequences surrounding  
755 the opsin gene arrays of African cichlid fishes. *BMC Evol. Biol.* 11, 120.  
756 <https://doi.org/10.1186/1471-2148-11-120>
- 757 Owen, J.P., Kelsh, R.N., Yates, C.A., 2020. A quantitative modelling approach to zebrafish  
758 pigment pattern formation. *eLife* 9, e52998. <https://doi.org/10.7554/eLife.52998>
- 759 Parichy, D.M., 2021. Evolution of pigment cells and patterns: recent insights from teleost  
760 fishes. *Curr. Opin. Genet. Dev.* 69, 88–96. <https://doi.org/10.1016/j.gde.2021.02.006>
- 761 Parichy, D.M., Spiewak, J.E., 2015. Origins of adult pigmentation: diversity in pigment stem  
762 cell lineages and implications for pattern evolution. *Pigment Cell Melanoma Res.* 28,  
763 31–50. <https://doi.org/10.1111/pcmr.12332>
- 764 Parsons, P.J., Bridle, J.R., Rüber, L., Genner, M.J., 2017. Evolutionary divergence in life  
765 history traits among populations of the Lake Malawi cichlid fish *Astatotilapia calliptera*.  
766 *Ecol. Evol.* 7, 8488–8506. <https://doi.org/10.1002/ece3.3311>
- 767 Patterson, L.B., Parichy, D.M., 2019. Zebrafish Pigment Pattern Formation: Insights into the  
768 Development and Evolution of Adult Form. *Annu. Rev. Genet.* 53, 505–530.  
769 <https://doi.org/10.1146/annurev-genet-112618-043741>
- 770 Powder, K.E., Albertson, R.C., 2016. Cichlid fishes as a model to understand normal and  
771 clinical craniofacial variation. *Dev. Biol., Animal models of craniofacial anomalies* 415,  
772 338–346. <https://doi.org/10.1016/j.ydbio.2015.12.018>
- 773 Protas, M.E., Hersey, C., Kochanek, D., Zhou, Y., Wilkens, H., Jeffery, W.R., Zon, L.I.,  
774 Borowsky, R., Tabin, C.J., 2006. Genetic analysis of cavefish reveals molecular  
775 convergence in the evolution of albinism. *Nat. Genet.* 38, 107–111.  
776 <https://doi.org/10.1038/ng1700>
- 777 Rasys, A.M., Park, S., Ball, R.E., Alcalá, A.J., Lauderdale, J.D., Menke, D.B., 2019. CRISPR-  
778 Cas9 Gene Editing in Lizards through Microinjection of Unfertilized Oocytes. *Cell Rep.*  
779 28, 2288–2292.e3. <https://doi.org/10.1016/j.celrep.2019.07.089>
- 780 Roberts, R.B., Moore, E.C., Kocher, T.D., 2017. An allelic series at *pax7a* is associated with  
781 colour polymorphism diversity in Lake Malawi cichlid fish. *Mol. Ecol.* 26, 2625–2639.

- 782 <https://doi.org/10.1111/mec.13975>
- 783 Ronco, F., Matschiner, M., Böhne, A., Boila, A., Büscher, H.H., El Taher, A., Indermaur, A.,  
784 Malinsky, M., Ricci, V., Kahmen, A., Jentoft, S., Salzburger, W., 2021. Drivers and  
785 dynamics of a massive adaptive radiation in cichlid fishes. *Nature* 589, 76–81.  
786 <https://doi.org/10.1038/s41586-020-2930-4>
- 787 Saenko, S.V., Lamichhane, S., Barrio, A.M., Rafati, N., Andersson, L., Milinkovitch, M.C.,  
788 2015. Amelanism in the corn snake is associated with the insertion of an LTR-  
789 retrotransposon in the OCA2 gene. *Sci. Rep.* 5, 17118.  
790 <https://doi.org/10.1038/srep17118>
- 791 Salzburger, W., 2018. Understanding explosive diversification through cichlid fish genomics.  
792 *Nat. Rev. Genet.* 19, 705–717. <https://doi.org/10.1038/s41576-018-0043-9>
- 793 Santos, M.E., Braasch, I., Boileau, N., Meyer, B.S., Sauter, L., Böhne, A., Belting, H.-G.,  
794 Affolter, M., Salzburger, W., 2014. The evolution of cichlid fish egg-spots is linked with  
795 a cis-regulatory change. *Nat. Commun.* 5, 5149. <https://doi.org/10.1038/ncomms6149>
- 796 Santos, M.E., Salzburger, W., 2012. How Cichlids Diversify. *Science*.
- 797 Schluter, D., 2000. *The ecology of adaptive radiation*. Oxford : Oxford University Press, 2000.
- 798 Singh, A.P., Nüsslein-Volhard, C., 2015. Zebrafish Stripes as a Model for Vertebrate Colour  
799 Pattern Formation. *Curr. Biol.* 25, R81–R92. <https://doi.org/10.1016/j.cub.2014.11.013>
- 800 Svardal, H., Quah, F.X., Malinsky, M., Ngatunga, B.P., Miska, E.A., Salzburger, W., Genner,  
801 M.J., Turner, G.F., Durbin, R., 2020. Ancestral Hybridization Facilitated Species  
802 Diversification in the Lake Malawi Cichlid Fish Adaptive Radiation. *Mol. Biol. Evol.* 37,  
803 1100–1113. <https://doi.org/10.1093/molbev/msz294>
- 804 Sylvester, J.B., Rich, C.A., Loh, Y.-H.E., Staaden, M.J. van, Fraser, G.J., Streelman, J.T.,  
805 2010. Brain diversity evolves via differences in patterning. *Proc. Natl. Acad. Sci.* 107,  
806 9718–9723. <https://doi.org/10.1073/pnas.1000395107>
- 807 Turner, G., Ngatunga, B.P., Genner, M.J., 2019. The Natural History of the Satellite Lakes of  
808 Lake Malawi. <https://doi.org/10.32942/osf.io/seh dq>
- 809 Varshney, G.K., Pei, W., LaFave, M.C., Idol, J., Xu, L., Gallardo, V., Carrington, B., Bishop,  
810 K., Jones, M., Li, M., Harper, U., Huang, S.C., Prakash, A., Chen, W., Sood, R., Ledin,  
811 J., Burgess, S.M., 2015. High-throughput gene targeting and phenotyping in zebrafish  
812 using CRISPR/Cas9. *Genome Res.* 25, 1030–1042.  
813 <https://doi.org/10.1101/gr.186379.114>
- 814 Wang, C., Lu, B., Li, T., Liang, G., Xu, M., Liu, X., Tao, W., Zhou, L., Kocher, T.D., Wang, D.,  
815 2021. Nile Tilapia: A Model for Studying Teleost Color Patterns. *J. Hered.* 112, 469–  
816 484. <https://doi.org/10.1093/jhered/esab018>
- 817 Wierson, W.A., Welker, J.M., Almeida, M.P., Mann, C.M., Webster, D.A., Torrie, M.E., Weiss,  
818 T.J., Kambakam, S., Vollbrecht, M.K., Lan, M., McKeighan, K.C., Levey, J., Ming, Z.,  
819 Wehmeier, A., Mikelson, C.S., Haltom, J.A., Kwan, K.M., Chien, C.-B., Balciunas, D.,  
820 Ekker, S.C., Clark, K.J., Webber, B.R., Moriarity, B.S., Solin, S.L., Carlson, D.F.,  
821 Dobbs, D.L., McGrail, M., Essner, J., 2020. Efficient targeted integration directed by  
822 short homology in zebrafish and mammalian cells. *eLife* 9, e53968.  
823 <https://doi.org/10.7554/eLife.53968>
